# Supplementary material
Source: PubMed Central journal article supplement (PMC7099468)
Supplement: jamaophthalmol-138-601-s001.pdf [file jamaophthalmol-138-601-s001.pdf]

## Supplementary Online Content

Virgili G, Parravano M, Gatta G, et al; RARECAREnet Working Group. Incidence and survival of patients with conjunctival melanoma in Europe. *JAMA Ophthalmol*. Published online March 26, 2020. doi:10.1001/jamaophthalmol.2020.0531

**eFigure.** Standardized incidence rates of conjunctival melanoma in European Registries adhering to the RARECAREnet project (y-axis) against the latitude of each registry (x-axis); the marker for each registry is specific to its geographic area. Years of diagnosis between 1995 and 2007

**eTable.** Sensitivity analysis adding sites 69.6 and 69.8, corresponding to periocular tissues, to age standardized incidence rates and their corresponding 95% confidence intervals (95%CI) calculation

This supplementary material has been provided by the authors to give readers additional information about their work.

**eFigure.** Standardized incidence rates of conjunctival melanoma in European Registries adhering to the RARECAREnet project (y-axis) against the latitude of each registry (x-axis); the marker for each registry is specific to its geographic area. Years of diagnosis between 1995 and 2007.

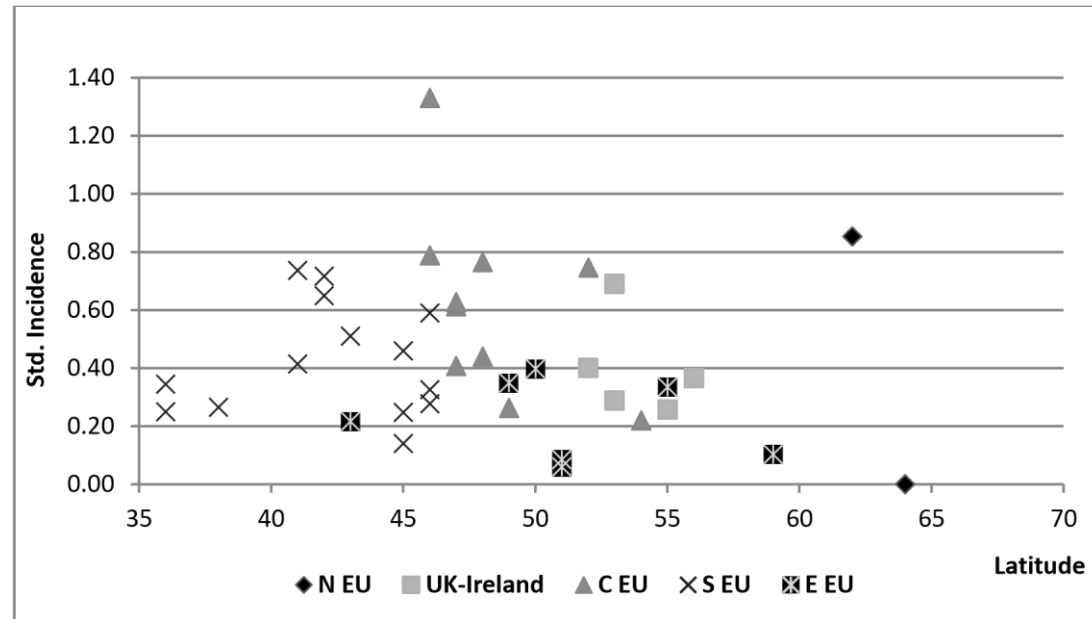

Std: standardized; N EU: Northern Europe; C EU: Central Europe; S EU: Southern Europe; E EU: Eastern Europe;

**eTable.** Sensitivity analysis adding sites 69.6 and 69.8, corresponding to periocular tissues, to age standardized incidence rates and their corresponding 95% confidence intervals (95%CI) calculation.

Registries without national coverage are labelled using commonly used country acronyms

| Area                   | Registry             | Coverage | C69.0    |      |                                               |             | C69.0,C69.6,C69.8 |      |                                               |             |
|------------------------|----------------------|----------|----------|------|-----------------------------------------------|-------------|-------------------|------|-----------------------------------------------|-------------|
|                        |                      |          | Patients |      | Age Standardized incidence (rates and 95% CI) |             | Patients          |      | Age Standardized incidence (rates and 95% CI) |             |
|                        |                      |          | n        | rate | lower limit                                   | upper limit | n                 | rate | lower limit                                   | upper limit |
| <b>Northern Europe</b> | Iceland              | National | 0        | 0.00 | 0.00                                          | 1.29        | 0                 | 0.00 | 0.00                                          | 1.29        |
|                        | Norway               | National | 46       | 0.85 | 0.62                                          | 1.15        | 57                | 1.06 | 0.79                                          | 1.38        |
|                        | <i>total</i>         |          | 46       | 0.81 | 0.59                                          | 1.09        | 57                | 1.00 | 0.75                                          | 1.31        |
| <b>UK-Ireland</b>      | Ireland              | National | 28       | 0.69 | 0.45                                          | 1.00        | 36                | 0.91 | 0.63                                          | 1.26        |
|                        | England              | National | 245      | 0.40 | 0.35                                          | 0.46        | 318               | 0.51 | 0.46                                          | 0.58        |
|                        | Northern Ireland     | National | 5        | 0.26 | 0.08                                          | 0.62        | 8                 | 0.43 | 0.18                                          | 0.86        |
|                        | Scotland             | National | 24       | 0.37 | 0.23                                          | 0.55        | 35                | 0.53 | 0.36                                          | 0.74        |
|                        | Wales                | National | 11       | 0.29 | 0.14                                          | 0.53        | 20                | 0.50 | 0.30                                          | 0.80        |
|                        | <i>total</i>         |          | 313      | 0.40 | 0.36                                          | 0.45        | 417               | 0.53 | 0.48                                          | 0.58        |
| <b>Central Europe</b>  | Austria              | National | 38       | 0.39 | 0.28                                          | 0.54        | 56                | 0.58 | 0.43                                          | 0.76        |
|                        | Loire Atlantique (F) |          | 7        | 0.61 | 0.24                                          | 1.28        | 7                 | 0.61 | 0.24                                          | 1.28        |
|                        | Hamburg (D)          |          | 5        | 0.22 | 0.07                                          | 0.53        | 5                 | 0.22 | 0.07                                          | 0.53        |
|                        | Saarland (D)         |          | 4        | 0.26 | 0.07                                          | 0.71        | 5                 | 0.32 | 0.10                                          | 0.79        |
|                        | Basel (CH)           |          | 4        | 0.77 | 0.19                                          | 2.01        | 4                 | 0.77 | 0.19                                          | 2.01        |
|                        | Geneva (CH)          |          | 4        | 0.79 | 0.20                                          | 2.08        | 5                 | 0.99 | 0.31                                          | 2.36        |
|                        | Grisons (CH)         |          | 1        | 0.41 | 0.01                                          | 2.25        | 1                 | 0.41 | 0.01                                          | 2.25        |
|                        | St. Gallen (CH)      |          | 3        | 0.63 | 0.13                                          | 1.76        | 3                 | 0.63 | 0.13                                          | 1.76        |
|                        | Valais (CH)          |          | 4        | 1.33 | 0.36                                          | 3.39        | 7                 | 2.21 | 0.87                                          | 4.60        |
|                        | The Netherlands      | National | 136      | 0.75 | 0.62                                          | 0.89        | 153               | 0.84 | 0.71                                          | 0.99        |

|                        |                            |          |     |      |      |      |     |      |      |      |
|------------------------|----------------------------|----------|-----|------|------|------|-----|------|------|------|
|                        | <i>total</i>               |          | 206 | 0.61 | 0.53 | 0.70 | 246 | 0.70 | 0.62 | 0.80 |
| <b>Southern Europe</b> |                            |          |     |      |      |      |     |      |      |      |
|                        | Biella (IT)                |          | 0   |      |      |      |     |      |      |      |
|                        | Ferrara (IT)               |          | 2   | 0.25 | 0.03 | 1.27 | 3   | 0.53 | 0.09 | 1.79 |
|                        | Friuli Venezia Giulia (IT) |          | 5   | 0,28 | 0.08 | 0.70 | 5   | 0,28 | 0.08 | 0.70 |
|                        | Latina (IT)                |          | 3   | 0.65 | 0.13 | 1.88 | 3   | 0.65 | 0.13 | 1.88 |
|                        | Modena (IT)                |          | 4   | 0.46 | 0.12 | 1.24 | 4   | 0.46 | 0.12 | 1.24 |
|                        | Napoli (IT)                |          | 4   | 0.74 | 0.20 | 1.94 | 6   | 1.15 | 0.42 | 2.54 |
|                        | Parma (IT)                 |          | 2   | 0.27 | 0.02 | 1.24 | 3   | 0.48 | 0.08 | 1.59 |
|                        | Ragusa (IT)                |          | 1   | 0.34 | 0.01 | 1.87 | 2   | 0.63 | 0.08 | 2.30 |
|                        | Reggio Emilia (IT)         |          | 0   |      |      |      | 0   |      |      |      |
|                        | Romagna (IT)               |          | 2   | 0.14 | 0.01 | 0.56 | 3   | 0.22 | 0.04 | 0.67 |
|                        | Sassari (IT)               |          | 2   | 0.41 | 0.05 | 1.49 | 2   | 0.41 | 0.05 | 1.49 |
|                        | Trentino (IT)              |          | 3   | 0.59 | 0.12 | 1.74 | 3   | 0.59 | 0.12 | 1.74 |
|                        | Umbria (IT)                |          | 6   | 0.51 | 0.17 | 1.19 | 9   | 0.83 | 0.36 | 1.64 |
|                        | Malta                      | National | 1   | 0.25 | 0.01 | 1.37 | 1   | 0.25 | 0.01 | 1.37 |
|                        | Slovenia                   | National | 7   | 0.33 | 0.13 | 0.67 | 9   | 0.42 | 0.19 | 0.79 |
|                        | Girona (ES)                |          | 5   | 0.72 | 0.22 | 1.71 | 5   | 0.72 | 0.22 | 1.71 |
|                        | <i>Total</i>               |          | 47  | 0.36 | 0.26 | 0.48 | 58  | 0.45 | 0.34 | 0.59 |
| <b>Eastern Europe</b>  |                            |          |     |      |      |      |     |      |      |      |
|                        | Bulgaria                   | National | 21  | 0.22 | 0.13 | 0.34 | 63  | 0.62 | 0.48 | 0.80 |
|                        | Czech Republic             | National | 47  | 0.40 | 0.29 | 0.53 | 60  | 0.51 | 0.39 | 0.66 |
|                        | Estonia                    | National | 2   | 0.10 | 0.01 | 0.41 | 4   | 0.22 | 0.06 | 0.58 |
|                        | Lithuania                  | National | 11  | 0.28 | 0.14 | 0.50 | 32  | 0.84 | 0.57 | 1.19 |
|                        | Cracow (PL)                |          | 0   |      |      |      | 2   | 0.19 | 0.02 | 0.75 |
|                        | Kielce (PL)                |          | 1   | 0.06 | 0.00 | 0.38 | 1   | 0.06 | 0.00 | 0.38 |
|                        | Silesia (PL)               |          | 3   | 0.09 | 0.02 | 0.26 | 8   | 0.25 | 0.11 | 0.49 |
|                        | Slovakia                   | National | 17  | 0.35 | 0.20 | 0.56 | 25  | 0.51 | 0.33 | 0.75 |
|                        | <i>Total</i>               |          | 102 | 0.27 | 0.22 | 0.33 | 195 | 0.51 | 0.44 | 0.59 |
| <b>Europe</b>          |                            |          |     |      |      |      |     |      |      |      |
|                        |                            |          | 714 | 0.42 | 0.39 | 0.45 | 973 | 0.57 | 0.53 | 0.61 |
